# Supplementary material for: Comparing Cytology Brushes for Optimal Human Nasal Epithelial Cell Collection: Implications for Airway Disease Diagnosis and Research
Source: MDPI journal article supplement (doi:10.3390/jpm13050864), 2023-05-21
Supplement: s1 [file s1]

## Supplementary Tables

**Table S1:** Cell counts obtained from paediatric participants brushed under general anaesthetic for comparative assessment of the Olympus and Endoscan brushes in phase one of the study.

|                                       | Olympus |           | Endoscan |           | <i>p</i> |
|---------------------------------------|---------|-----------|----------|-----------|----------|
|                                       | Median  | IQR       | Median   | IQR       |          |
| Total cell count<br>( $\times 10^6$ ) | 1.4     | 0.4 – 3.8 | 2.2      | 1.0 – 8.1 | 0.031    |
| Live cell count<br>( $\times 10^6$ )  | 0.2     | 0.1 – 0.8 | 0.9      | 0.5 – 1.9 | 0.016    |
| Cell Viability (%<br>live)            | 23      | 8 - 48    | 56       | 44 - 61   | 0.097    |

IQR: Interquartile range

**Table S2:** Cell counts of participants brushed with the Endoscan brush under general anaesthetic (GA) or in the awake state in phase two of the study.

|                                       | GA<br>n=52 |           | Awake<br>n=93 |           |
|---------------------------------------|------------|-----------|---------------|-----------|
|                                       | Mean*      | 95% CI    | Mean *        | 95% CI    |
| Total cell count<br>( $\times 10^6$ ) | 4.9        | 3.9 - 6.0 | 1.4           | 1.1 - 1.8 |
| Live cell count<br>( $\times 10^6$ )  | 1.7        | 1.5 - 2.1 | 0.4           | 0.3 - 0.5 |

\*Geometric Mean

Supplementary Figure S1

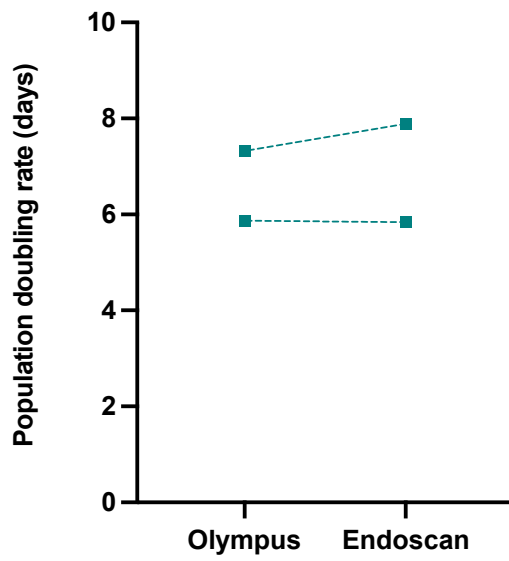

**Figure S1.** Population doubling rates of side-by-side cultures from the Olympus and Endoscan brush. Samples were seeded using equal cell counts from each brush. Paired samples are connected using a dashed line,  $n = 2$ .
